# Supplementary material
Source: PubMed Central journal article supplement (PMC5860329)
Supplement: kwx147levinewebmaterialfinal.pdf [file kwx147levinewebmaterialfinal.pdf]

# Web Materials

Web Figure 1: Power Analysis

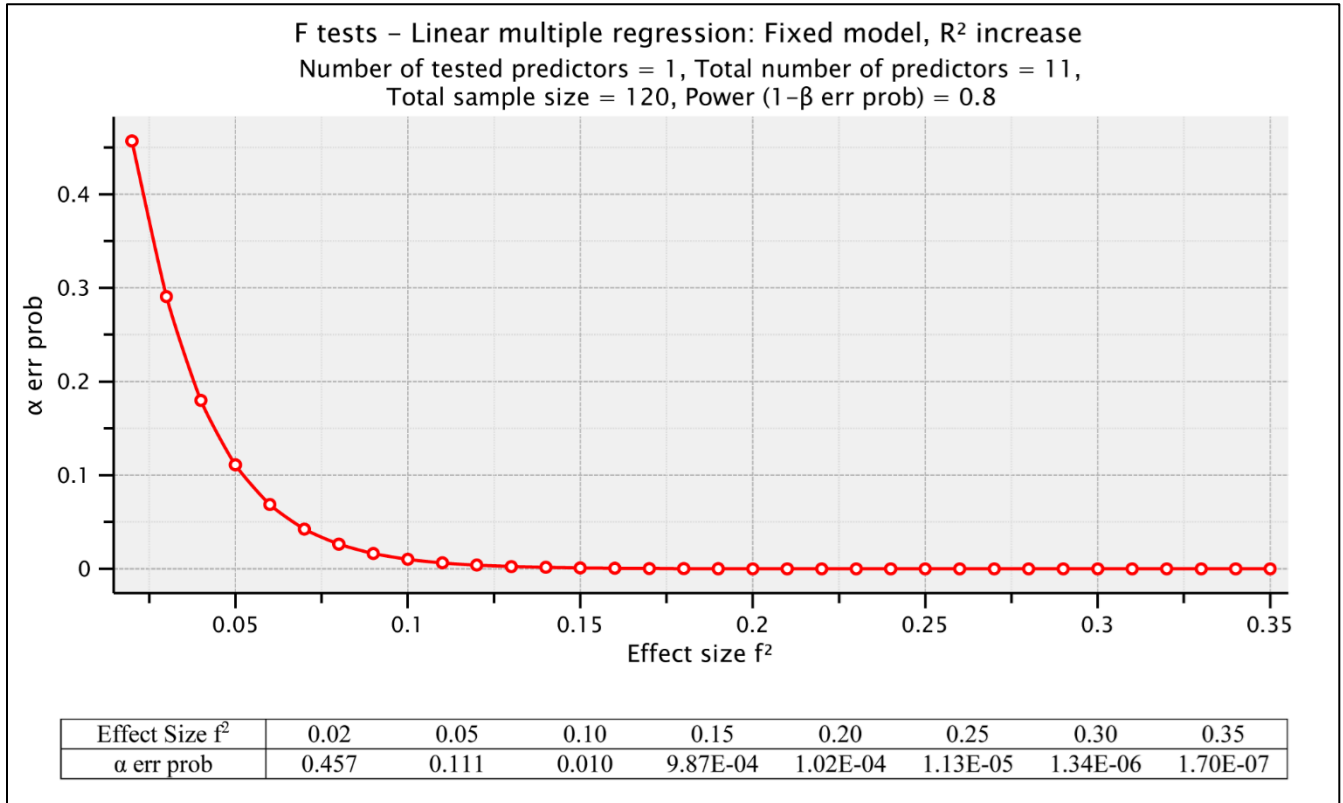

**Web Table 1: Descriptive Characteristics of CTRA Genes**

| Gene           | Mean Expression | SD Expression | Weight | Gene         | Mean Expression | SD Expression | Weight |
|----------------|-----------------|---------------|--------|--------------|-----------------|---------------|--------|
| <i>FOS</i>     | 9.1214          | 0.60208       | 1      | <i>IGLL1</i> | 10.1834         | 0.89786       | -1     |
| <i>FOSB</i>    | 7.6236          | 0.24062       | 1      | <i>IGLL3</i> | 7.2715          | 0.36518       | -1     |
| <i>FOSL1</i>   | 7.0772          | 0.12179       | 1      | <i>IL1A</i>  | 6.7155          | 0.05743       | 1      |
| <i>FOSL2</i>   | 7.9418          | 0.24239       | 1      | <i>IL1B</i>  | 9.6875          | 0.44485       | 1      |
| <i>GBP1</i>    | 9.2878          | 0.65323       | -1     | <i>IL6</i>   | 6.8624          | 0.08208       | 1      |
| <i>IFI16</i>   | 10.2039         | 0.37002       | -1     | <i>IL8</i>   | 7.9149          | 0.53171       | 1      |
| <i>IFI27</i>   | 8.8773          | 1.51204       | -1     | <i>IRF2</i>  | 7.5457          | 0.16798       | -1     |
| <i>IFI27L1</i> | 7.8652          | 0.23875       | -1     | <i>IRF7</i>  | 9.3768          | 0.37223       | -1     |
| <i>IFI27L2</i> | 8.7403          | 0.30431       | -1     | <i>IRF8</i>  | 10.4425         | 0.3819        | -1     |
| <i>IFI30</i>   | 10.9483         | 0.31067       | -1     | <i>JUN</i>   | 7.5585          | 0.30712       | 1      |
| <i>IFI35</i>   | 10.0553         | 0.3881        | -1     | <i>JUNB</i>  | 8.7182          | 0.33144       | 1      |
| <i>IFI44</i>   | 8.4234          | 0.84858       | -1     | <i>JUND</i>  | 13.2956         | 0.19913       | 1      |
| <i>IFI44L</i>  | 8.8567          | 0.99734       | -1     | <i>MX1</i>   | 11.8348         | 0.72047       | -1     |
| <i>IFI6</i>    | 11.0491         | 0.48912       | -1     | <i>MX2</i>   | 10.9607         | 0.45268       | -1     |
| <i>IFIH1</i>   | 8.4589          | 0.47504       | -1     | <i>NFKB1</i> | 11.5023         | 0.24399       | 1      |
| <i>IFIT1</i>   | 9.1547          | 0.87844       | -1     | <i>NFKB2</i> | 7.9169          | 0.24425       | 1      |
| <i>IFIT1L</i>  | 9.8474          | 0.9845        | -1     | <i>OAS1</i>  | 8.7235          | 0.50326       | -1     |
| <i>IFIT2</i>   | 11.1822         | 0.6937        | -1     | <i>OAS2</i>  | 9.0911          | 0.4649        | -1     |
| <i>IFIT3</i>   | 9.2109          | 0.7288        | -1     | <i>OAS3</i>  | 8.0096          | 0.6181        | -1     |
| <i>IFIT5</i>   | 7.4131          | 0.34356       | -1     | <i>OASL</i>  | 8.5559          | 0.54943       | -1     |
| <i>IFITM1</i>  | 12.8738         | 0.28426       | -1     | <i>PTGS1</i> | 8.6474          | 0.47963       | 1      |
| <i>IFITM2</i>  | 14.1959         | 0.2415        | -1     | <i>PTGS2</i> | 8.1839          | 0.56934       | 1      |
| <i>IFITM3</i>  | 12.2667         | 0.85051       | -1     | <i>REL</i>   | 7.0528          | 0.13181       | 1      |
| <i>IFITM4P</i> | 7.0311          | 0.11824       | -1     | <i>RELA</i>  | 7.7923          | 0.20267       | 1      |
| <i>IFITM5</i>  | 6.6949          | 0.06029       | -1     | <i>RELB</i>  | 8.3766          | 0.29872       | 1      |
| <i>IFNB1</i>   | 6.7193          | 0.06654       | -1     | <i>TNF</i>   | 8.5667          | 0.24556       | 1      |
| <i>IGJ</i>     | 8.0586          | 0.84695       | -1     | <i>TNF</i>   | 8.5667          | 0.24556       | 1      |
